# Supplementary material for: Cardiovascular Disease Burden and Outcomes Among American Indian and Alaska Native Medicare Beneficiaries
Source: PubMed Central journal article supplement (PMC10517375; doi:10.1001/jamanetworkopen.2023.34923), 2023-09-22
Supplement: jamanetwopen-e2334923-s002.pdf [file jamanetwopen-e2334923-s002.pdf]

## Data Sharing Statement

Eberly. Cardiovascular Disease Burden and Outcomes Among American Indian and Alaska Native Medicare Beneficiaries. *JAMA Netw Open*. Published September 21, 2023.  
doi:10.1001/jamanetworkopen.2023.34923

### Data

**Data available:** No

### Additional Information

**Explanation for why data not available:** Data was purchased through a licensing agreement with CMS. Thus, we are unable to share raw data. We can, however, share all summary data tables.
